# Supplementary material for: Intracranial Cerebrospinal Fluid Volume as a Predictor of Malignant Middle Cerebral Artery Infarction
Source: PubMed Central journal article supplement — Stroke. 2019 May 16;50(6):1437–43. doi: 10.1161/STROKEAHA.119.024882 (PMC6553515; doi:10.1161/strokeaha.119.024882), 2019-05-16
Supplement: str-50-1437-s001.pdf [file str-50-1437-s001.pdf]

## **SUPPLEMENTAL MATERIAL**

## Supplemental Tables

**Table I.** Characteristics of patients with and without thin slice non-contrast CT images

| <b>Characteristic</b>                                       | <b>Included</b><br>n=286 | <b>Excluded</b><br>n=175 | <b>P-value*</b> |
|-------------------------------------------------------------|--------------------------|--------------------------|-----------------|
| Age, mean±SD                                                | 67±14                    | 65±15                    | 0.090           |
| Male sex, n (%)                                             | 162 (57)                 | 102 (58)                 | 0.803           |
| Admission NIHSS,<br>median (Q1-Q3)                          | 13 (7-17)                | 13 (9-19)                | 0.061           |
| Time from symptom onset to scan,<br>minutes, median (Q1-Q3) | 113 (68-160)             | 85 (62-135)              | 0.011           |
| Intravenous tPA, n (%)                                      | 201 (70)                 | 131 (75)                 | 0.339           |
| Endovascular treatment, n (%)                               | 33 (12)                  | 27 (15)                  | 0.288           |
| <b>Medical history</b>                                      |                          |                          |                 |
| Hypertension, n (%)                                         | 145 (51)                 | 89 (51)                  | 1.000           |
| Diabetes mellitus, n (%)                                    | 36 (13)                  | 25 (15)                  | 0.651           |
| Hyperlipidemia, n (%)                                       | 80 (28)                  | 45 (27)                  | 0.800           |
| Smoking                                                     |                          |                          | 0.792           |
| - Smoking currently, n (%)                                  | 79 (30)                  | 45 (30)                  |                 |
| - Former smoking, n (%)                                     | 83 (32)                  | 52 (35)                  |                 |
| - Never smoked, n (%)                                       | 100 (38)                 | 53 (35)                  |                 |
| Atrial fibrillation, n (%)                                  | 47 (17)                  | 24 (14)                  | 0.491           |
| History of stroke/TIA, n (%)                                | 56 (20)                  | 25 (14)                  | 0.180           |
| History of MI, n (%)                                        | 41 (15)                  | 15 (9)                   | 0.093           |
| <b>Imaging findings</b>                                     |                          |                          |                 |
| Hyperdense vessel sign, n (%)                               | 126 (44)                 | 106 (62)                 | <0.001          |
| NCCT ASPECTS, median (Q1-Q3)                                | 10 (8-10)                | 10 (8-10)                | 0.717           |
| CBV ASPECTS, median (Q1-Q3)                                 | 7 (5-9)                  | 7 (5-9)                  | 0.054           |
| MTT ASPECTS, median (Q1-Q3)                                 | 3 (2-6)                  | 4 (3-6)                  | 0.021           |
| Terminal ICA/proximal M1<br>occlusion, n (%)                | 69 (24)                  | 48 (27)                  | 0.496           |
| Poor collateral score, n (%)                                | 89 (31)                  | 48 (28)                  | 0.534           |
| <b>Follow-up</b>                                            |                          |                          |                 |
| Malignant MCA infarction, n (%)                             | 35 (12)                  | 19 (11)                  | 0.766           |
| Poor clinical outcome at 90 days*, n (%)                    | 151 (53)                 | 86 (50)                  | 0.576           |

\* Either parametric or non-parametric tests were performed depending on the variable distribution.

† defined as mRS≥3

ME: malignant edema, SD: standard deviation, NIHSS: National Institutes of Health Stroke Scale, tPA: tissue plasminogen activator, TIA: transient ischemic attack, MI: myocardial infarction, NCCT: non-contrast CT, ASPECTS: Alberta Stroke Program Early CT Score, CSF: cerebrospinal fluid, ICV: intracranial volume, CBV: cerebral blood volume, MTT: mean transit time, ICA: internal carotid artery, CBS: clot burden score, MCA: middle cerebral artery.

**Table II.** Association between potential predictors and malignant middle cerebral artery infarction

| <b>Characteristic</b>                          | <b>OR<br/>(95%-CI)</b> |
|------------------------------------------------|------------------------|
| Age, per 10 years decrease                     | 1.5 (1.2-2.0)          |
| Male sex                                       | 1.5 (0.7-3.3)          |
| Admission NIHSS,<br>per point increase         | 1.2 (1.1-1.3)          |
| Intravenous tPA                                | 0.6 (0.3-1.2)          |
| Endovascular treatment                         | 1.7 (0.6-4.3)          |
| <b>Imaging findings</b>                        |                        |
| Hyperdense vessel on NCCT                      | 3.5 (1.7-8.0)          |
| NCCT (pc-)ASPECTS score,<br>per point decrease | 1.8 (1.5-2.1)          |
| CSF volume, per 100 mL decrease                | 3.1 (1.6-6.5)          |
| CSF/ICV per 10% decrease                       | 4.5 (1.9-11.7)         |
| CBV (pc-)ASPECTS score,<br>per point decrease  | 1.7 (1.5-2.1)          |
| Terminal ICA/proximal M1 occlusion             | 7.3 (3.5-16.0)         |
| Poor collateral score                          | 7.3 (3.4-16.7)         |

OR: odds ratio, NIHSS: National Institutes of Health Stroke Scale, tPA: tissue plasminogen activator, ref: reference, TIA: transient ischemic attack, MI: myocardial infarction, NCCT: non-contrast CT, ASPECTS: Alberta Stroke Program Early CT Score, CSF: cerebrospinal fluid, ICV: intracranial volume, CBV: cerebral blood volume, MTT: mean transit time, ICA: internal carotid artery, CBS: clot burden score.

**Table III.** Subgroup characteristics: patients aged from 18 to 60

| <b>Characteristic</b>                        | <b>Total<br/>n=87</b> | <b>ME<br/>n=20 (23%)</b> | <b>No ME<br/>n=67 (77%)</b> | <b>P-value*</b> |
|----------------------------------------------|-----------------------|--------------------------|-----------------------------|-----------------|
| Age, mean±SD                                 | 50±8                  | 48±10                    | 50±7                        | 0.439           |
| Male sex, n (%)                              | 58 (67)               | 14 (70)                  | 44 (66)                     | 0.719           |
| Admission NIHSS,<br>median (Q1-Q3)           | 12 (7-17)             | 16 (13-18)               | 12 (7-15)                   | 0.001           |
| <b>Imaging findings</b>                      |                       |                          |                             |                 |
| CSF/ICV percentage, mean±SD                  | 9±4                   | 9±4                      | 10±4                        | 0.418           |
| Terminal ICA/proximal M1<br>occlusion, n (%) | 22 (25)               | 12 (60)                  | 10 (15)                     | <0.001          |
| Poor collateral score, n (%)                 | 25 (29)               | 13 (65)                  | 12 (18)                     | <0.001          |
| <b>Follow-up</b>                             |                       |                          |                             |                 |
| Poor clinical outcome at 90 days†,<br>n (%)  | 43 (50)               | 19 (95)                  | 24 (36)                     | <0.001          |

\* Either parametric or non-parametric tests were performed depending on the variable distribution.

† defined as mRS≥3

ME: malignant edema, SD: standard deviation, NIHSS: National Institutes of Health Stroke Scale, CSF: cerebrospinal fluid, ICV: intracranial volume, ICA: internal carotid artery.

**Table IV.** Subgroup analysis: multivariable prediction models and the association with malignant middle cerebral artery infarction in patients aged from 18 to 60

| <b>Factor</b>                       | <b>Model 1<br/>OR (95% CI)</b> | <b>Model 2<br/>OR (95% CI)</b> | <b>Model 3<br/>OR (95% CI)</b> |
|-------------------------------------|--------------------------------|--------------------------------|--------------------------------|
| Age, per 10 years decrease          | 1.3 (0.7-2.7)                  |                                |                                |
| Admission NIHSS, per point increase | 1.2 (1.1-1.3)                  | 1.1 (1.0-1.3)                  |                                |
| Terminal ICA/proximal M1 occlusion  |                                |                                | 9.6 (2.5-36.7)                 |
| Poor collateral score               |                                | 5.5 (1.6-18.5)                 | 9.6 (2.6-35.6)                 |
| CSF/ICV, per 10% decrease           | 2.4 (0.5-12.5)                 | 1.7 (0.3-10.8)                 | 1.1 (0.2-8.1)                  |

OR: odds ratio, CI: confidence interval, NIHSS: National Institutes of Health Stroke Scale, CSF: cerebrospinal fluid, ICV: intracranial volume.

**Table V.** Subgroup analysis: comparison of clinical and imaging models with and without the ratio between intracranial cerebrospinal fluid volume and intracranial volume in patients aged from 18 to 60

| <b>Factor</b>                                                  | <b>AUROC</b> | <b>95% CI</b> | <b>P-value</b> |
|----------------------------------------------------------------|--------------|---------------|----------------|
| Age + NIHSS                                                    | 0.736        | 0.612-0.860   |                |
| Age + NIHSS + CSF/ICV                                          | 0.754        | 0.630-0.877   |                |
| Difference                                                     | 0.018        |               | 0.278          |
| NIHSS + Poor collateral score                                  | 0.800        | 0.690-0.910   |                |
| NIHSS+ Poor collateral score+ CSF/ICV                          | 0.812        | 0.704-0.919   |                |
| Difference                                                     | 0.012        |               | 0.545          |
| ICA/proximal M1 occlusion +<br>Poor collateral score           | 0.836        | 0.706-0.936   |                |
| ICA/proximal M1 occlusion +<br>Poor collateral score + CSF/ICV | 0.840        | 0.706-0.966   |                |
| Difference                                                     | 0.004        |               | 0.916          |

AUROC: area under the receiver operating characteristic, CI: confidence interval, NIHSS: National Institutes of Health Stroke Scale, CSF: cerebrospinal fluid, ICV: intracranial volume.

**Table VI.** Subgroup characteristics: patients with NIHSS of 16 or greater

| <b>Characteristic</b>                        | <b>Total<br/>n=95</b> | <b>ME<br/>n=21 (22%)</b> | <b>No ME<br/>n=74 (78%)</b> | <b>P-value*</b> |
|----------------------------------------------|-----------------------|--------------------------|-----------------------------|-----------------|
| Age, mean±SD                                 | 68±15                 | 61±19                    | 69±13                       | 0.084           |
| Male sex, n (%)                              | 46 (48)               | 12 (57)                  | 34 (46)                     | 0.365           |
| Admission NIHSS,<br>median (Q1-Q3)           | 18 (17-20)            | 19 (18-22)               | 18 (17-20)                  | 0.042           |
| <b>Imaging findings</b>                      |                       |                          |                             |                 |
| CSF/ICV percentage, mean±SD                  | 13±4                  | 12±5                     | 13±4                        | 0.119           |
| Terminal ICA/proximal M1<br>occlusion, n (%) | 33 (35)               | 12 (57)                  | 21 (28)                     | 0.015           |
| Poor collateral score, n (%)                 | 47 (50)               | 17 (81)                  | 30 (41)                     | 0.001           |
| <b>Follow-up</b>                             |                       |                          |                             |                 |
| Poor clinical outcome at 90 days†,<br>n (%)  | 74 (79)               | 21 (100)                 | 53 (73)                     | 0.007           |

\* Either parametric or non-parametric tests were performed depending on the variable distribution.

† defined as mRS≥3

ME: malignant edema, SD: standard deviation, NIHSS: National Institutes of Health Stroke Scale, CSF: cerebrospinal fluid, ICV: intracranial volume, ICA: internal carotid artery.

**Table VII.** Subgroup analysis: multivariable prediction models and the association with malignant middle cerebral artery infarction in patients with NIHSS of 16 or greater

| <b>Factor</b>                       | <b>Model 1<br/>OR (95% CI)</b> | <b>Model 2<br/>OR (95% CI)</b> | <b>Model 3<br/>OR (95% CI)</b> |
|-------------------------------------|--------------------------------|--------------------------------|--------------------------------|
| Age, per 10 years decrease          | 1.4 (0.9-2.0)                  |                                |                                |
| Admission NIHSS, per point increase | 1.2 (1.0-1.5)                  | 1.2 (1.0-1.4)                  |                                |
| Terminal ICA/proximal M1 occlusion  |                                |                                | 3.7 (1.2-11.3)                 |
| Poor collateral score               |                                | 5.7 (1.7-19.6)                 | 7.0 (2.0-24.9)                 |
| CSF/ICV, per 10% decrease           | 1.9 (0.5-7.8)                  | 3.5 (0.9-13.0)                 | 3.1 (0.9-11.0)                 |

OR: odds ratio, CI: confidence interval, NIHSS: National Institutes of Health Stroke Scale, CSF: cerebrospinal fluid, ICV: intracranial volume.



**Table VIII.** Subgroup analysis: comparison of clinical and imaging models with and without the ratio between intracranial cerebrospinal fluid volume and intracranial volume in patients with NIHSS of 16 or greater

| <b>Factor</b>                                                  | <b>AUROC</b> | <b>95% CI</b> | <b>P-value</b> |
|----------------------------------------------------------------|--------------|---------------|----------------|
| Age + NIHSS                                                    | 0.674        | 0.537-0.811   |                |
| Age + NIHSS + CSF/ICV                                          | 0.714        | 0.586-0.841   |                |
| Difference                                                     | 0.040        |               | 0.355          |
| NIHSS + Poor collateral score                                  | 0.753        | 0.645-0.860   |                |
| NIHSS+ Poor collateral score+ CSF/ICV                          | 0.777        | 0.650-0.905   |                |
| Difference                                                     | 0.024        |               | 0.047          |
| ICA/proximal M1 occlusion +<br>Poor collateral score           | 0.767        | 0.634-0.898   |                |
| ICA/proximal M1 occlusion +<br>Poor collateral score + CSF/ICV | 0.796        | 0.648-0.944   |                |
| Difference                                                     | 0.029        |               | 0.070          |

AUROC: area under the receiver operating characteristic, CI: confidence interval, NIHSS: National Institutes of Health Stroke Scale, CSF: cerebrospinal fluid, ICV: intracranial volume.

## Supplemental Figures

**Figure I.** Flowchart of patient selection

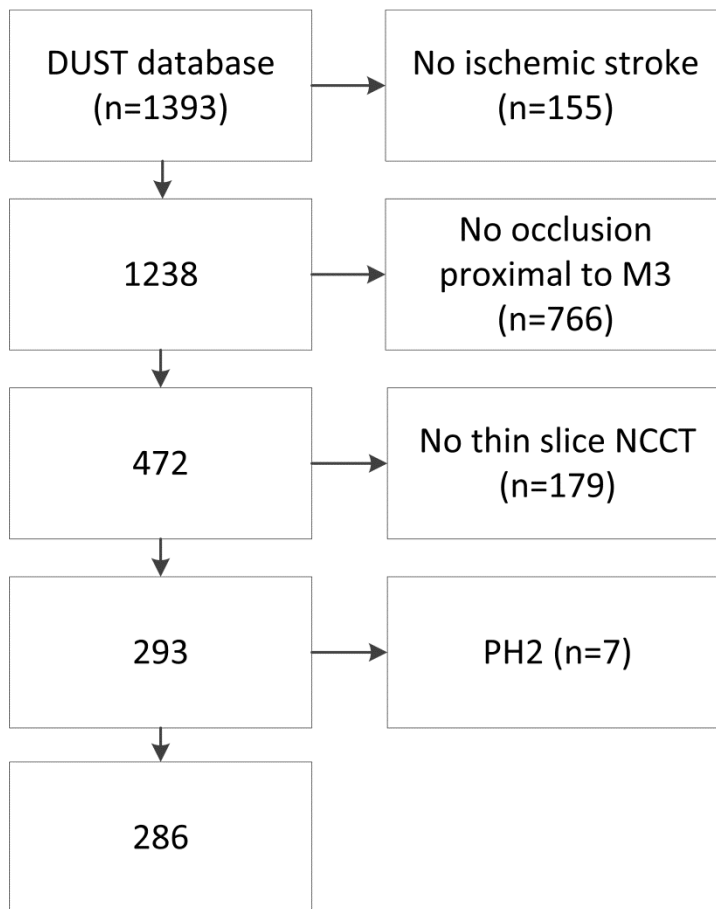

Legends: DUST: Dutch acute stroke study, NCCT: non-contrast CT, PH2: parenchymal hemorrhage type 2 according to ECASS classification.
